# Supplementary material for: Electrocatalytic behavior of a heterostructured nanocomposite sensor for aminotriazole
Source: Royal Society of Chemistry journal article supplement (doi:10.1039/d0nj04644b), 2020-01-01

## Supplementary Figure

**Fig. S1.** (A) X-ray Diffraction patterns, (B) Energy-dispersive X-ray spectroscopy, (C) Scanning electron microscopy, (D) Transmission electron microscopy images of 5% Ca-doped ZnO nanoparticles.

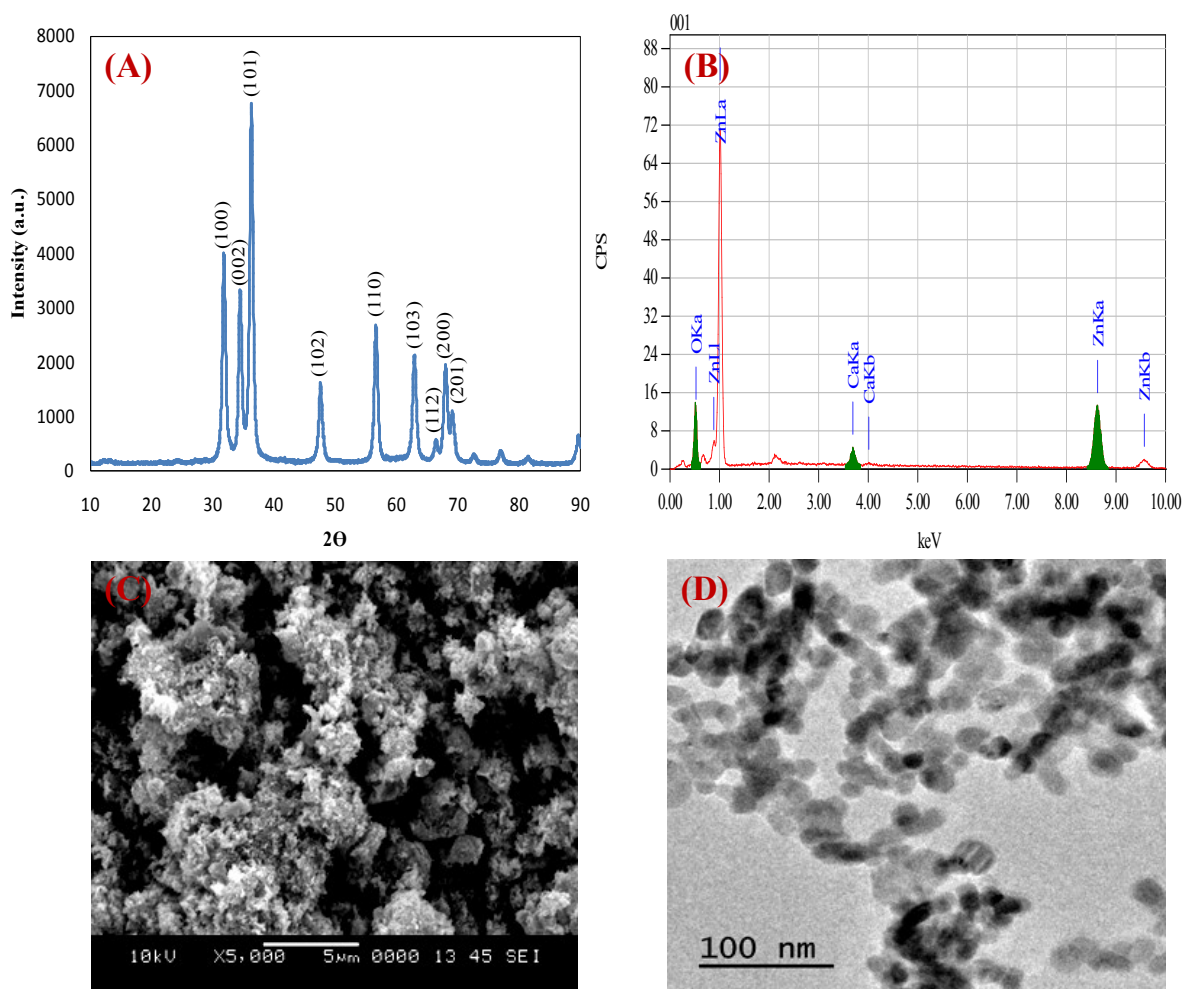

Supplement: d0nj04644b1.pdf [file d0nj04644b1.pdf]
